# Supplementary material for: Cancer Therapy-Related Cardiac Dysfunction in Patients Treated with a Combination of an Immune Checkpoint Inhibitor and Doxorubicin
Source: MDPI journal article supplement (doi:10.3390/cancers14092320), 2022-05-07
Supplement: s1 [file s1]

Supplementary Materials

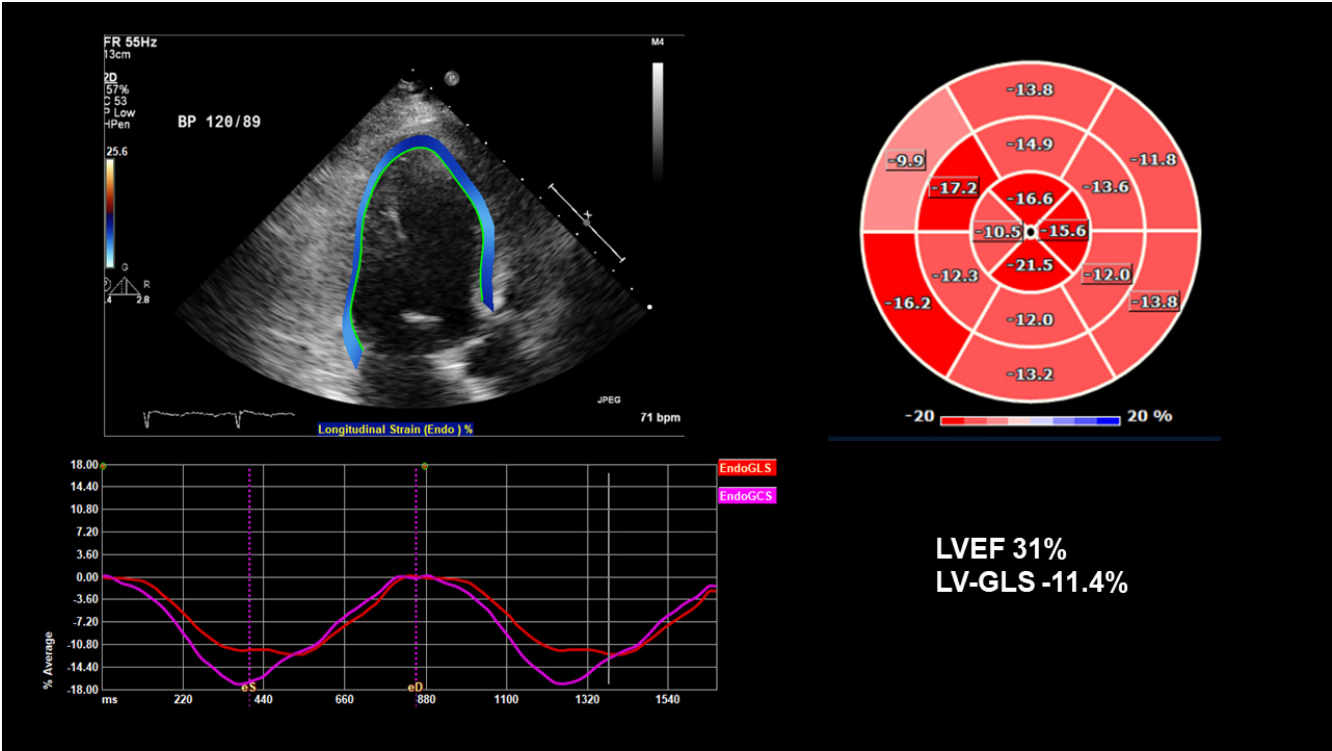

Figure S1. Representative images for assessing LVGLS.

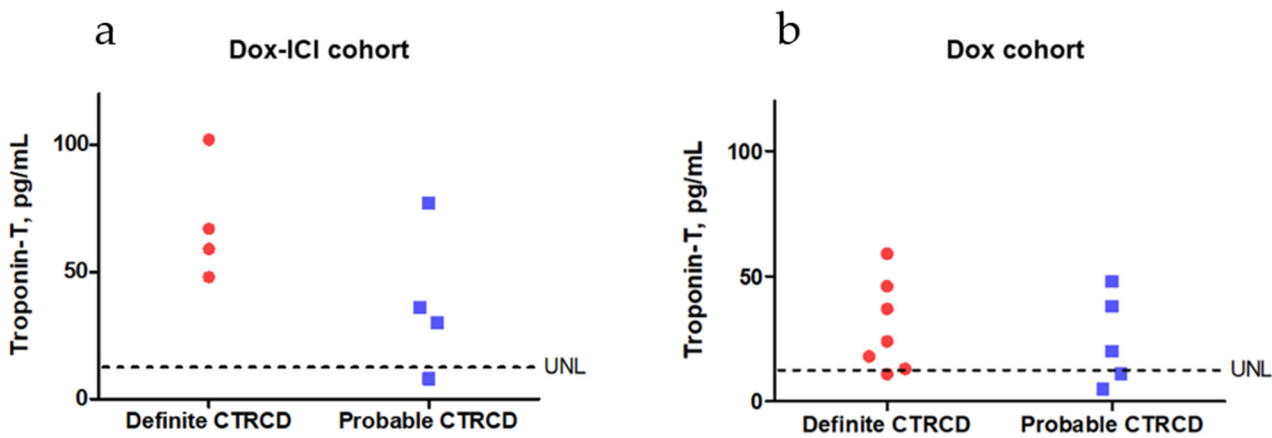

Figure S2. : (a) and (b) In both the Dox-ICI and Dox cohorts, more than half of the patients who developed probable and definite CTRCD had elevated troponin-T levels above the upper normal limit

Table S1. Change of echocardiographic parameters during serial follow up.

| Parameter | Dox-ICI cohort (n = 22) |             |             |          |          | Dox cohort (n = 73) |             |             |          |          |
|-----------|-------------------------|-------------|-------------|----------|----------|---------------------|-------------|-------------|----------|----------|
|           | Baseline                | 3-month     | 6-month     | p value* | p value† | Baseline            | 3-month     | 6-month     | p value* | p value† |
| LVEF, %   | 65.5 ± 5.3              | 66.0 ± 5.2  | 55.2 ± 9.0  | 0.691    | 0.003    | 66.6 ± 6.3          | 61.6 ± 9.2  | 59 ± 6      | 0.001    | <0.001   |
| LVGLS, %  | -18.6 ± 1.9             | -17.6 ± 4.1 | -15.3 ± 3.6 | 0.250    | 0.015    | -17.3 ± 2.3         | -16.3 ± 2.3 | -15.4 ± 3.6 | 0.139    | <0.001   |

LVEF, left ventricular ejection fraction; LVGLS, left ventricular global longitudinal strain. \*p for baseline vs. 3-month; †p for baseline vs. 6-month.
